# Supplementary material for: A simple liquid state 1H NMR measurement to directly determine the surface hydroxyl density of porous silica
Source: Royal Society of Chemistry journal article supplement (doi:10.1039/d1cc03959h), 2021-01-01
Supplement: d1cc03959h1.pdf [file d1cc03959h1.pdf]

## SUPPLEMENTARY INFORMATION

# A simple liquid state $^1\text{H}$ NMR measurement to directly determine the surface hydroxyl density of porous silica

C. Penrose<sup>a</sup>, P. Steiner<sup>a,b</sup>, L.F. Gladden<sup>a</sup>, A.J. Sederman<sup>a</sup>, A.P.E. York<sup>c</sup>, M. Bentley<sup>c</sup> and M.D. Mantle<sup>a</sup>

<sup>a</sup>Department of Chemical Engineering and Biotechnology, University of Cambridge, Philippa Fawcett Dr, Cambridge CB3 0AS, UK; Tel: (N/A); E-mail: mdm20@cam.ac.uk.

<sup>b</sup>Gdanska 335/23, Praha 8, 181 00, Czech Republic.

<sup>c</sup>Johnson Matthey Technology Centre, Blounts Court, Sonning Common, Reading, RG4 9NH

## Contents

### S1. NMR Acquisition Parameters

### S2. Error Analysis

### S3. BET $\text{N}_2$ Surface Area Method Details

### S4. Expanded Table on As Received CARiACT Q Series Hydroxyl Densities

### S5. Silica Left at Different Durations in $\text{D}_2\text{O}$ Solution and its Effects on the Surface Hydroxyl Density

### S6. Active region of RF coil

## References

## S1. NMR Acquisition Parameters

$^1\text{H}$  NMR spectra were collected using a Magritek Spinsolve 43 MHz NMR benchtop spectrometer. The following parameters were used:  $90^\circ$  pulse duration was  $7\ \mu\text{s}$ , pulse amplitude was 0 dB, receiver gain was 40, number of points on FID collected was 16384, dwell time was  $100\ \mu\text{s}$ , number of scans was 8 and recycle time was 120 s.

The recycle time is calculated on the basis that  $T_1$  of  $^1\text{H}$  for magnetically diluted systems like this one are much longer.  $T_1$  were recorded for 10, 5 and  $0\ \mu\text{L}$  of  $\text{H}_2\text{O}$  in 1 mL of  $\text{D}_2\text{O}$ , as  $10.26 \pm 0.04\ \text{s}$ ,  $10.41 \pm 0.04\ \text{s}$  and  $9.00 \pm 0.20\ \text{s}$  respectively. Hence 120 s ensures that the acquired data is free from relaxation artefacts.

## S2. Error Analysis

There are several sources of experimental error that need to be accounted for when producing the calibration plot in Figure 1. The error in the integral of  $^1\text{H}$  intensity relates to the precision of the NMR spectrometer and was determined by calculating the uncertainty from three independent repeat  $^1\text{H}$  NMR measurements of the same flame sealed 1 mL  $\text{D}_2\text{O}$  +  $10\ \mu\text{L}$   $\text{H}_2\text{O}$  sample across multiple days. The uncertainty in the integral of intensity from these measurements came to  $\pm 0.9\ \%$ . Figure 1 represents this uncertainty in y-axis error bars.

The error associated with the mass concentration  $\delta_{OH}$  is derived from the standard error of prediction<sup>1</sup> in determining [H atoms]. A modified standard error of prediction is provided using the following equation (Eq.2):

$$s_{[H\ atoms]} = \frac{s(r)}{m} \sqrt{\frac{1}{n} + \frac{(I_{sample} - \bar{I}_{calibration})^2}{m^2 \sum_{i=1}^n ([H\ atoms]_i - [H\ atoms])^2}} \quad (2)$$

where

$$s(r) = \sqrt{\frac{\sum_{i=1}^n (I_{calibration} - \hat{I}_{calibration})^2}{n - 2}}$$

here  $s(r)$  is the residual standard deviation,  $m$  is the gradient of the calibration plot,  $n$  is the number of calibration points taken ( $[H\ atoms]$ ,  $I_{calibration}$ ) and  $I_{sample}$  is the integral of intensity for the silica sample measured. The bars over parameters represent mean values and  $\hat{I}_{calibration}$  with the hat is the integral value as predicted by the line of best fit  $I_{calibration} = m[H\ atoms]$ .

The standard error of prediction was modified to remove the term that would have concerned  $N$  number of  $^1H$  NMR repeat measurements on the same silica sample. As the uncertainty from repeat measurements on the same flame sealed sample were small, it should be fair to use this modification. The unmodified version penalises systems where the uncertainty between  $N$  repeat measurements could be much larger than it is here. The maximum standard error prediction for all samples except the 800 °C dehydroxylation, was calculated to be  $\pm 4.2\%$ . The samples dehydroxylated at 800 °C had a maximum standard error prediction of  $\pm 11.6\%$  instead.

The total uncertainty for  $\alpha_{OH}$  is derived from the error propagation of instrument precisions, the standard error of prediction and uncertainty from ( $n = 3$ ) replicated silica samples. For the full breakdown of individual errors check S4.

### S3. BET N<sub>2</sub> Surface Area Method Details

Brunauer–Emmett–Teller BET N<sub>2</sub> analysis was performed on a Micromeritics 3Flex. Experiments were conducted at 77 K and degassing conditions of 300 °C for 4 hours under N<sub>2</sub> purge. The silica samples were measured as received, and after any dehydroxylation or rehydroxylation treatment. These measurements were used to obtain the BET specific surface areas.

### S4. Expanded Table on As Received CARiACT Q Series Hydroxyl Densities

The expanded Table S4 shows the full results of the as received CARiACT Q series silicas it includes the values for each replicated sample ( $n = 3$ ) as well as the BET surface areas and background corrected integral of  $^1H$  intensity. The error in the background correction is linked to the purity of the D<sub>2</sub>O used, therefore the highest purity D<sub>2</sub>O should be used to minimise the overall error associated with the final  $\alpha_{OH}$  calculation. With this expanded table it should be easier working left to right using Eq.1 to work the surface hydroxyl density  $\alpha_{OH}$ . Also, the table provides the errors associated with each of measurements and also the uncertainty from replicated samples can be

calculated. Therefore, the total uncertainty can be worked out by error propagation of the uncertainty from replications (n = 3) and the uncertainty from the sum of errors from the mass of beads to the BET surface area which comes to  $\pm 7.15\%$ .

**Table S4: Expanded table of hydroxyl densities of CARiACT Q Series silica with full list of parameters to calculate the surface hydroxyl density.**

| Sample | Batch | Mass of silica beads / g<br>$\pm 0.05\%$ | Background Corrected Integral of $^1\text{H}$ intensity<br>$\pm 0.9\%$ | Mass concentration $\delta_{\text{OH}}$ / mmol/g<br>$\pm 4.2\%$ | Surface area / $\text{m}^2/\text{g}$<br>$\pm 2.0\%$ | Surface hydroxyl density $\alpha_{\text{OH}}$ / OH/ $\text{nm}^2$ | Average $\alpha_{\text{OH}}$ / OH/ $\text{nm}^2$ |
|--------|-------|------------------------------------------|------------------------------------------------------------------------|-----------------------------------------------------------------|-----------------------------------------------------|-------------------------------------------------------------------|--------------------------------------------------|
| Q6     | 1     | 0.1543                                   | 1.9984e+04                                                             | 0.97                                                            | 407                                                 | 1.44                                                              | 1.51 $\pm$ 0.13                                  |
|        | 2     | 0.1798                                   | 2.5366e+04                                                             | 1.06                                                            |                                                     | 1.57                                                              |                                                  |
|        | 3     | 0.1974                                   | 2.6813e+04                                                             | 1.02                                                            |                                                     | 1.51                                                              |                                                  |
| Q10    | 1     | 0.1333                                   | 1.3017e+04                                                             | 0.73                                                            | 312                                                 | 1.41                                                              | 1.29 $\pm$ 0.17                                  |
|        | 2     | 0.1350                                   | 1.0582e+04                                                             | 0.59                                                            |                                                     | 1.14                                                              |                                                  |
|        | 3     | 0.1678                                   | 1.5789e+04                                                             | 0.68                                                            |                                                     | 1.31                                                              |                                                  |
| Q15    | 1     | 0.1006                                   | 2.0289e+04                                                             | 1.51                                                            | 207                                                 | 4.39                                                              | 4.52 $\pm$ 0.36                                  |
|        | 2     | 0.1161                                   | 2.3642e+04                                                             | 1.53                                                            |                                                     | 4.45                                                              |                                                  |
|        | 3     | 0.1397                                   | 3.0255e+04                                                             | 1.62                                                            |                                                     | 4.71                                                              |                                                  |
| Q30    | 1     | 0.1699                                   | 2.1390e+04                                                             | 0.94                                                            | 107                                                 | 5.29                                                              | 5.35 $\pm$ 0.81                                  |
|        | 2     | 0.1583                                   | 1.7578e+04                                                             | 0.83                                                            |                                                     | 4.67                                                              |                                                  |
|        | 3     | 0.1779                                   | 2.5512e+04                                                             | 1.08                                                            |                                                     | 6.08                                                              |                                                  |
| Q50    | 1     | 0.1640                                   | 1.4301e+04                                                             | 0.65                                                            | 70                                                  | 5.59                                                              | 5.16 $\pm$ 0.70                                  |
|        | 2     | 0.1719                                   | 1.1584e+04                                                             | 0.51                                                            |                                                     | 4.39                                                              |                                                  |
|        | 3     | 0.1756                                   | 1.5031e+04                                                             | 0.64                                                            |                                                     | 5.51                                                              |                                                  |

## S5. Silica Left at Different Durations in D<sub>2</sub>O Solution and its Effects on the Surface Hydroxyl Density

The CARiACT Q6 and Q15 beads were left in D<sub>2</sub>O solution for both 3 hours as described in step (4) in the main text, and alternatively the same procedure was carried out, but the beads were left for 24 hours. It is important to note that the background integral mentioned in step (7) in the main text was retaken as well with a 24 hour duration and is used in subsequent calculations for the surface hydroxyl densities  $\alpha_{OH}$  provided in Figure S5.

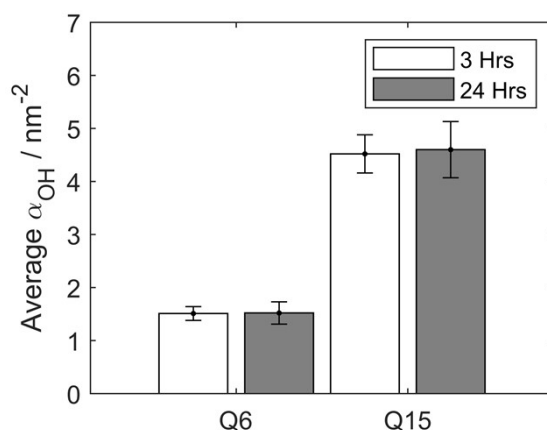

**Figure S5: The average surface hydroxyl densities  $\alpha_{OH}$  of CARiACT Q6 and Q15 silicas when left for 3 hours (white) and 24 hours (grey) in D<sub>2</sub>O solution. The error bars are derived from the uncertainty of n = 3 batches.**

## S6. Active region of RF coil

In order to assess the "active region" of the RF coil for different solvent column heights we ran three different <sup>1</sup>H NMR experiments of three separate 5 mm nmr tubes filled to heights/volumes of solvent of stock solution: (i) 30.0 mm/ 400  $\mu$ l; (ii) 46.0 mm/ 600  $\mu$ l; (iii) 78.0 mm / 1000  $\mu$ l. The stock solution was 5 mL of D<sub>2</sub>O with 10  $\mu$ L of H<sub>2</sub>O so it was representative of samples used during a OH density measurement involving silica. Note all our sample volumes from actual experiments described in the main manuscript were > 500  $\mu$ l (> 38.0 mm solvent column height)

The <sup>1</sup>H spectra were run under identical acquisition parameters to those of the experiments and figure 1 below shows the results of the integration of the <sup>1</sup>H signal and indicates that there is no systematic change in <sup>1</sup>H integral with solvent column height (data in Table 2).

Table 2. Results of <sup>1</sup>H integrals for three different solvent heights

| Sample              | <sup>1</sup> H integral |
|---------------------|-------------------------|
| 30 mm Height/0.4 mL | 6.9504 +/- 0.0177e+04   |
| 46 mm Height/0.6 mL | 7.1938 +/- 0.0421e+04   |
| 78 mm height/1.0 mL | 6.9857 +/- 0.0369e+04   |

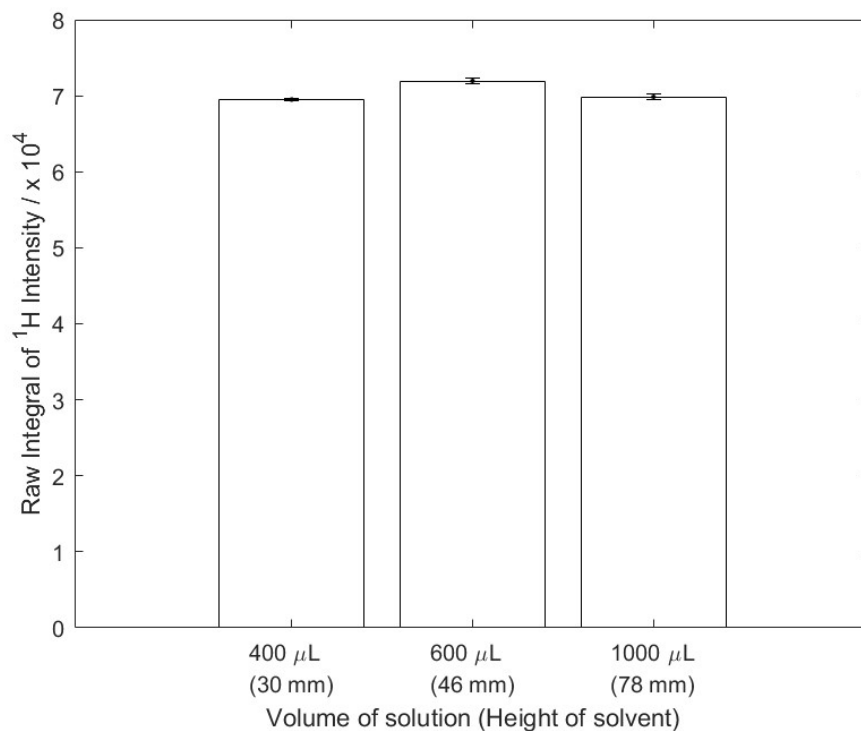

The error bars on the figure above represent the standard deviation of 3 independent repeats for each sample. The difference between the absolute integrals is less than 0.5 % which is negligible.

## References

- 1 L. Prichard and V. Barwick, *Preparation of Calibration Curves A Guide to Best Practice*, 2003.
- 2 V. A. Hackley and A. B. Stefaniak, *J Nanopart Res*, 2013, **15**, 1742.
